# Supplementary material for: HERPUD1 as a potential prognostic biomarker in lung cancer and association with migration and invasion
Source: Research Square preprint supplement (doi:10.21203/rs.3.rs-3194710/v1), 2023-07-28
Supplement: Supplementary file 1 [file 235eb892fd698bc40646d2db.docx]

**Supplementary Table 5.** Univariate Cox analysis of ER stress-related genes in GSE68465

| Gene | HR | Low95 | High95 | P-value |
| --- | --- | --- | --- | --- |
| ERO1A | 1.352613 | 1.191102 | 1.536025 | 4.72E-06 |
| STC2 | 1.418019 | 1.207052 | 1.665858 | 2.38E-05 |
| PIK3R1 | 0.620083 | 0.493002 | 0.779923 | 4.02E-05 |
| ERMP1 | 1.534364 | 1.239814 | 1.898892 | 8.22E-05 |
| NIBAN1 | 0.806306 | 0.702529 | 0.925413 | 0.002321 |
| FICD | 0.659097 | 0.503835 | 0.862204 | 0.002073 |
| ERLIN1 | 1.553484 | 1.158327 | 2.083447 | 0.003718 |
| MBTPS2 | 1.354536 | 1.099714 | 1.668404 | 0.003149 |
| ATF6B | 0.731708 | 0.589745 | 0.907843 | 0.003632 |
| PIK3R2 | 0.690387 | 0.532304 | 0.895419 | 0.004384 |
| UGGT1 | 1.43268 | 1.112643 | 1.844771 | 0.005806 |
| ECPAS | 1.483175 | 1.104683 | 1.991348 | 0.008431 |
| CALR | 0.6415 | 0.458945 | 0.896672 | 0.008409 |
| TMX1 | 1.384235 | 1.081871 | 1.771104 | 0.009402 |
| SERINC3 | 0.632547 | 0.446219 | 0.896678 | 0.010555 |
| BCL2 | 0.740309 | 0.588381 | 0.931466 | 0.008905 |
| APAF1 | 1.530275 | 1.103634 | 2.121845 | 0.010296 |
| OPA1 | 1.536939 | 1.097108 | 2.153098 | 0.011065 |
| USP13 | 0.796211 | 0.665193 | 0.953035 | 0.012571 |
| NR1H2 | 0.715508 | 0.548883 | 0.932715 | 0.014656 |
| EIF2S1 | 1.469559 | 1.081735 | 1.996425 | 0.014733 |
| PMAIP1 | 1.130444 | 1.024887 | 1.246873 | 0.013387 |
| HERPUD1 | 0.779112 | 0.635504 | 0.955171 | 0.017637 |
| PARK7 | 0.612804 | 0.405604 | 0.925851 | 0.020474 |
| CLU | 0.89941 | 0.821042 | 0.985259 | 0.022979 |
| RNF121 | 0.731119 | 0.558451 | 0.957174 | 0.023424 |
| UBE2G2 | 0.734548 | 0.561879 | 0.960278 | 0.023047 |
| NCK1 | 1.297688 | 1.034835 | 1.627305 | 0.023365 |
| PML | 1.369564 | 1.042245 | 1.799679 | 0.026263 |
| DNAJC10 | 1.188119 | 1.021843 | 1.381452 | 0.021682 |
| TMEM259 | 0.869507 | 0.76755 | 0.985008 | 0.031008 |
| DNAJC3 | 0.847823 | 0.729941 | 0.984742 | 0.034776 |
| TRIB3 | 1.197067 | 1.007031 | 1.422965 | 0.044526 |
| RNF5 | 0.783507 | 0.615792 | 0.9969 | 0.047451 |
