# Supplementary material for: HERPUD1 as a potential prognostic biomarker in lung cancer and association with migration and invasion
Source: Research Square preprint supplement (doi:10.21203/rs.3.rs-3194710/v1), 2023-07-28
Supplement: Supplementary file 2 [file 49d8bf11041951de00e381dc.docx]

**Supplementary Table 2.** The primer sequences of HERPUD1 and its related expressed genes

| **Gene symbols** |  | **Primer sequence (5’-3’)** |
| --- | --- | --- |
| GAPDH Forward |  | CTGGGCTACACTGAGCACC |
| GAPDH Reverse |  | AAGTGGTCGTTGAGGGCAATG |
| HERPUD1 Forward |  | CCTCCAAAATGCCAGAAACCAGC |
| HERPUD1 Reverse |  | GCCGTAAACCATCACTTGAGGAG |
| GRP78 Forward |  | CTGTCCAGGCTGGTGTGCTCT |
| GRP78 Reverse |  | CTTGGTAGGCACCACTGTGTTC |
| CHOP Forward |  | GGTATGAGGACCTGCAAGAGGT |
| CHOP Reverse |  | CTTGTGACCTCTGCTGGTTCTG |
| IRE1 Forward |  | CCGAACGTGATCCGCTACTTCT |
| IRE1 Reverse |  | CGCAAAGTCCTTCTGCTCCACA |
