# Supplementary material for: HERPUD1 as a potential prognostic biomarker in lung cancer and association with migration and invasion
Source: Research Square preprint supplement (doi:10.21203/rs.3.rs-3194710/v1), 2023-07-28
Supplement: Supplementary file 3 [file 5ea7d62e95a0cccd590ee345.docx]

**Supplementary Table 3.** Univariate Cox analysis of ER stress-related genes in GSE72094

| Gene | HR | Low95 | High95 | P-value |
| --- | --- | --- | --- | --- |
| STC2 | 1.436517 | 1.2469 | 1.654969 | 5.10E-07 |
| LRRK2 | 0.750284 | 0.667097 | 0.843844 | 1.20E-06 |
| RNF175 | 0.651297 | 0.541113 | 0.783918 | 6.02E-06 |
| ERMP1 | 1.853293 | 1.416154 | 2.425367 | 1.07E-05 |
| EDEM1 | 0.477964 | 0.343769 | 0.664544 | 1.20E-05 |
| ERP27 | 0.761801 | 0.669291 | 0.867098 | 4.05E-05 |
| THBS4 | 0.755834 | 0.660646 | 0.864738 | 5.00E-05 |
| SERP1 | 0.364452 | 0.226219 | 0.587153 | 5.17E-05 |
| ITPR1 | 0.607116 | 0.473745 | 0.778036 | 9.22E-05 |
| USP14 | 2.755004 | 1.643044 | 4.619503 | 0.000121 |
| RASGRF1 | 0.71433 | 0.593948 | 0.85911 | 0.000336 |
| RNFT1 | 0.490238 | 0.33077 | 0.726585 | 0.000366 |
| ERLEC1 | 0.374036 | 0.217588 | 0.64297 | 0.000374 |
| EIF2S1 | 2.178672 | 1.420616 | 3.341234 | 0.000386 |
| ALOX15 | 0.823649 | 0.732982 | 0.925532 | 0.001062 |
| BCL2 | 0.617924 | 0.458807 | 0.832223 | 0.00159 |
| MANF | 2.230994 | 1.352613 | 3.679793 | 0.001691 |
| FAM8A1 | 0.564938 | 0.393741 | 0.810569 | 0.001942 |
| PLA2G6 | 0.49037 | 0.310791 | 0.773714 | 0.002214 |
| TTC23L | 0.57876 | 0.406683 | 0.823646 | 0.00256 |
| UBXN6 | 0.452638 | 0.270103 | 0.75853 | 0.002639 |
| ERP44 | 0.396331 | 0.216074 | 0.726967 | 0.002797 |
| UBQLN2 | 0.392514 | 0.213055 | 0.723135 | 0.002826 |
| NHLRC1 | 0.726686 | 0.589239 | 0.896195 | 0.002839 |
| CCDC47 | 0.426602 | 0.244293 | 0.74496 | 0.002858 |
| SYVN1 | 0.550666 | 0.371031 | 0.817273 | 0.003121 |
| CFTR | 0.873807 | 0.796797 | 0.958261 | 0.00398 |
| USP13 | 0.673196 | 0.514216 | 0.881327 | 0.004166 |
| CLU | 0.708486 | 0.556341 | 0.902239 | 0.005182 |
| VCP | 0.512912 | 0.32141 | 0.818514 | 0.005292 |
| EIF2AK2 | 1.790098 | 1.177154 | 2.7222 | 0.006514 |
| USP25 | 0.578474 | 0.390594 | 0.856727 | 0.006527 |
| RNF139 | 0.521016 | 0.3243 | 0.837055 | 0.007112 |
| ELAVL4 | 0.68879 | 0.525919 | 0.9021 | 0.007172 |
| ABCA7 | 0.577598 | 0.382802 | 0.871519 | 0.009207 |
| HSPA1A | 1.905739 | 1.150463 | 3.156852 | 0.012266 |
| TRIM13 | 0.650941 | 0.462979 | 0.915212 | 0.01393 |
| FLOT1 | 1.789697 | 1.12643 | 2.843513 | 0.014573 |
| TMEM67 | 0.738139 | 0.576036 | 0.94586 | 0.016587 |
| DNAJC18 | 0.604965 | 0.401323 | 0.91194 | 0.01722 |
| SVIP | 0.631038 | 0.428688 | 0.928901 | 0.020064 |
| FBXO44 | 0.629599 | 0.426109 | 0.930268 | 0.020547 |
| FBXO6 | 0.702327 | 0.517605 | 0.952972 | 0.024226 |
| YOD1 | 0.675853 | 0.479676 | 0.952262 | 0.02543 |
| DNAJB9 | 0.694453 | 0.504108 | 0.956671 | 0.02561 |
| HERPUD1 | 0.672725 | 0.474391 | 0.953979 | 0.026124 |
| RNF121 | 1.812005 | 1.06676 | 3.077883 | 0.028066 |
| PMAIP1 | 1.204275 | 1.019644 | 1.422339 | 0.028393 |
| PIK3R1 | 0.725257 | 0.543125 | 0.968464 | 0.02975 |
| BCL2L11 | 1.471361 | 1.036829 | 2.088004 | 0.030475 |
| UBXN10 | 0.84091 | 0.718119 | 0.984699 | 0.031206 |
| THBS1 | 1.253702 | 1.020858 | 1.539655 | 0.031309 |
| TRIB3 | 1.287743 | 1.02288 | 1.621188 | 0.03135 |
| EIF2AK3 | 0.660335 | 0.45066 | 0.967565 | 0.033287 |
| MAN1A1 | 0.761558 | 0.587647 | 0.986938 | 0.03971 |
| CREB3L4 | 1.298107 | 1.011039 | 1.666683 | 0.040661 |
| NGLY1 | 0.618075 | 0.388255 | 0.983932 | 0.042907 |
| TMEM129 | 0.602315 | 0.368134 | 0.985466 | 0.044305 |
| ATF6B | 1.63199 | 1.01279 | 2.629755 | 0.04448 |
| COPS5 | 1.587252 | 1.008804 | 2.49738 | 0.045903 |
| RHBDD2 | 0.670198 | 0.452529 | 0.992567 | 0.046149 |
| HM13 | 1.688626 | 1.008398 | 2.827713 | 0.047143 |
| MAP3K5 | 0.731454 | 0.536135 | 0.997931 | 0.048718 |
| TMTC3 | 1.511758 | 1.001421 | 2.282168 | 0.04959 |
