# Supplementary material for: HERPUD1 as a potential prognostic biomarker in lung cancer and association with migration and invasion
Source: Research Square preprint supplement (doi:10.21203/rs.3.rs-3194710/v1), 2023-07-28
Supplement: Supplementary file 4 [file 8ca6edcba68858acc6835d9b.docx]

**Supplementary Table 4.** Univariate Cox analysis of ER stress-related genes in TCGA-LUAD

| Gene | HR | Low95 | High95 | P-value |
| --- | --- | --- | --- | --- |
| ERO1A | 1.555307461 | 1.285436484 | 1.881836502 | 7.34E-06 |
| HSPA1A | 1.44997947 | 1.193016097 | 1.762290107 | 0.000231879 |
| EIF2AK3 | 0.489927663 | 0.332938708 | 0.72094085 | 0.000218174 |
| CFTR | 0.725775531 | 0.599200297 | 0.879088553 | 0.000524748 |
| HERPUD1 | 0.673139438 | 0.518339116 | 0.874170382 | 0.003315168 |
| RNF175 | 0.456540433 | 0.26254756 | 0.79387204 | 0.00299083 |
| LRRK2 | 0.836141216 | 0.736056793 | 0.949834496 | 0.004539556 |
| BAK1 | 1.596808402 | 1.141746712 | 2.233242316 | 0.006704408 |
| TRIM13 | 0.535179701 | 0.334630374 | 0.855921445 | 0.008346624 |
| PML | 1.471974723 | 1.097274167 | 1.974629176 | 0.009930647 |
| PDX1 | 1.344714831 | 1.068099225 | 1.692968156 | 0.019539448 |
| BCL2L1 | 1.438471774 | 1.089018929 | 1.90005976 | 0.01009171 |
| FAF2 | 1.66660141 | 1.117983698 | 2.484437176 | 0.013521437 |
| CERT1 | 0.626417306 | 0.434293032 | 0.903534278 | 0.011863098 |
| ERN1 | 0.676839582 | 0.495766212 | 0.924048088 | 0.01318674 |
| ITPR1 | 0.719491567 | 0.552047956 | 0.93772309 | 0.01271978 |
| FAM8A1 | 0.670439598 | 0.483716287 | 0.929241513 | 0.016045648 |
| CEBPB | 1.331841847 | 1.052423324 | 1.685446023 | 0.018564228 |
| SELENOK | 0.659774809 | 0.466692765 | 0.932739549 | 0.015139037 |
| RNFT1 | 0.670198958 | 0.475342589 | 0.944932461 | 0.019080099 |
| RASGRF1 | 0.782606203 | 0.6321325 | 0.968898875 | 0.017446616 |
| NCCRP1 | 1.137478392 | 1.015843162 | 1.273678005 | 0.03320128 |
| ERLEC1 | 0.714863555 | 0.532760184 | 0.959211887 | 0.025324055 |
| LPCAT3 | 0.702282875 | 0.514209993 | 0.959143625 | 0.025923471 |
| STC2 | 1.191127008 | 1.01839893 | 1.39315106 | 0.031915682 |
| TTC23L | 0.305195649 | 0.104694687 | 0.889676324 | 0.015733758 |
| FBXO17 | 1.2717166 | 1.014289052 | 1.594479509 | 0.04239675 |
| EDEM1 | 0.759687874 | 0.58666158 | 0.983745459 | 0.035196168 |
