# Supplementary material for: HERPUD1 as a potential prognostic biomarker in lung cancer and association with migration and invasion
Source: Research Square preprint supplement (doi:10.21203/rs.3.rs-3194710/v1), 2023-07-28
Supplement: Supplementary file 5 [file e47c641ce2a7c070f2318b62.docx]

**Supplementary Figure legends**

**Figure S1** **The criterion of consensus clustering in GSE72094 and TCGA-LUAD, and the PCA analysis in GEO and TCGA datasets.** (A-C) Consensus clustering CDF, delta area and tracking plot for k = 2 to k = 6 in GSE72094. (D-F) Consensus clustering CDF for k = 2 to k = 6 in TCGA-LUAD. According to the average consistency assessment within the cluster group, the number of clusters with the highest average consistency within the group is K=2. (G-I) PCA analysis indicating an obvious difference in transcriptomes between the two subgroups in GEO and TCGA datasets.

**Figure S2 Construction cluster model of ER Stress in GSE68465.** (A) (A) k-means clustering of lung adenocarcinoma based on ER stress-related gene calculated through a ssGSEA in the GSE68465. (B) Heatmap displaying consensus clustering with the robust classification in the GSE72094 (k = 2). (C) Kaplan-Meier curves of OS between cluster1 and cluster2 in the TCGA-LUAD. Log-rank test p values are shown. (D) Consensus clustering CDF, delta area and tracking plot for k = 2 to k = 6 in GSE68465.

**Figure S3 The expression and prognosis of STC2 in GEO and TCGA datasets.** (A) The expression of STC2 was different in LUAD and LUSC. (B) STC2’s expression in normal tissue and tumor tissue in GSE32863. (C) The OS and DFS survival curves demonstrated patient survival with high (red) and low (blue) STC2 expression in TCGA-LUAD using GENPIA tool. ns, not significant.

**Figure S4 The clinical value of HERPUD1 in LUAD patients.** (A) Downregulated HERPUD1 were remarkably interrelated to nodal metastasis. N0, without nodal metastasis, N1, with nodal metastasis. (B) HERPUD1 was correlated with LUAD stages, and patients with increased stages tended to express lower HERPUD1. (C) HERPUD1 was apparently bound up with TP53 mutant, and HERPUD1 tended to be lower in TP53 mutant group. (D) HERPUD1 was significantly related to smoking and no-smoking, and HERPUD1 tended to be lower in smoking group.

**Figure S5 The immune score of HERPUD1 by immuneeconv algorithm.** (A) Heat maps showing CIBERSORT score form TCGA-LUAD. Blue indicated positively correlated genes and red indicated negatively correlated genes. (B) Heat maps showing xCell score form TCGA-LUAD. Blue indicated positively correlated genes and red indicated negatively correlated genes. (C) Heat maps showing MCP-counter score form TCGA-LUAD. Blue indicated positively correlated genes and red indicated negatively correlated genes. (D) Heat maps showing QuanTIseq score form TCGA-LUAD. Blue indicated positively correlated genes and red indicated negatively correlated genes. (E) Heat maps showing EPIC score form TCGA-LUAD. Blue indicated positively correlated genes and red indicated negatively correlated genes. * p < 0.05; ** p < 0.01; *** p < 0.001.
