# Supplementary material for: HERPUD1 as a potential prognostic biomarker in lung cancer and association with migration and invasion
Source: Research Square preprint supplement (doi:10.21203/rs.3.rs-3194710/v1), 2023-07-28
Supplement: Supplementary file 6 [file f2b534c9ba83f7095e8c1e7e.docx]

**Supplementary Table 1.** The list of ER stress related gene

| The list of ER stress related gene | | | | | |
| --- | --- | --- | --- | --- | --- |
| ABCA7 | CFTR | ERN2 | MIR200C | RNF121 | TMUB1 |
| ABL1 | CHAC1 | ERO1A | NCCRP1 | RNF139 | TMUB2 |
| AGR2 | CLGN | ERP27 | NCK1 | RNF175 | TMX1 |
| AIFM1 | CLU | ERP29 | NCK2 | RNF183 | TNFRSF10B |
| ALOX15 | COPS5 | ERP44 | NFE2L2 | RNF185 | TOR1A |
| ALOX5 | CREB3 | FAF1 | NGLY1 | RNF186 | TP53 |
| AMFR | CREB3L1 | FAF2 | NHLRC1 | RNF5 | TRAF2 |
| ANKS4B | CREB3L2 | FAM8A1 | NIBAN1 | RNFT1 | TRIB3 |
| ANKZF1 | CREB3L3 | FBXO17 | NPLOC4 | RNFT2 | TRIM13 |
| APAF1 | CREB3L4 | FBXO2 | NR1H2 | SCAMP5 | TRIM25 |
| AQP11 | CTH | FBXO27 | NR1H3 | SDF2L1 | TTC23L |
| ATF3 | CXCL8 | FBXO44 | NRBF2 | SEC16A | TXNDC12 |
| ATF4 | DAB2IP | FBXO6 | NUPR1 | SEC61B | UBA5 |
| ATF6 | DDIT3 | FCGR2B | OPA1 | SEL1L | UBAC2 |
| ATF6B | DDRGK1 | FGF21 | OS9 | SEL1L2 | UBE2G2 |
| ATG10 | DDX3X | FICD | P4HB | SELENOK | UBE2J1 |
| ATP2A1 | DERL1 | FLOT1 | PARK7 | SELENOS | UBE2J2 |
| ATP2A2 | DERL2 | FOXRED2 | PARP16 | SERINC3 | UBE4A |
| ATP2A3 | DERL3 | GET4 | PDIA2 | SERP1 | UBE4B |
| ATXN3 | DNAJB12 | GORASP2 | PDIA3 | SERP2 | UBQLN1 |
| AUP1 | DNAJB14 | GRINA | PDIA4 | SESN2 | UBQLN2 |
| BAG6 | DNAJB2 | GSK3B | PDX1 | SGTA | UBXN1 |
| BAK1 | DNAJB9 | HERPUD1 | PIGBOS1 | SGTB | UBXN10 |
| BAX | DNAJC10 | HERPUD2 | PIK3R1 | SIRT1 | UBXN4 |
| BBC3 | DNAJC18 | HM13 | PIK3R2 | SRPX | UBXN6 |
| BCAP31 | DNAJC3 | HSP90B1 | PLA2G6 | STC2 | UBXN8 |
| BCL2 | ECPAS | HSPA1A | PMAIP1 | STT3B | UFC1 |
| BCL2L1 | EDEM1 | HSPA5 | PML | STUB1 | UFD1 |
| BCL2L11 | EDEM2 | HYOU1 | PPP1R15A | SVIP | UFL1 |
| BFAR | EDEM3 | ITPR1 | PPP1R15B | SYVN1 | UFM1 |
| BHLHA15 | EIF2AK2 | JKAMP | PPP2CB | TBL2 | UGGT1 |
| BOK | EIF2AK3 | JUN | PRKN | THBS1 | UGGT2 |
| BRSK2 | EIF2AK4 | LPCAT3 | PSMC6 | THBS4 | USP13 |
| CALR | EIF2B5 | LRRK2 | PTPN1 | TMBIM6 | USP14 |
| CALR3 | EIF2S1 | MAGEA3 | PTPN2 | TMCO1 | USP19 |
| CANX | EIF4G1 | MAN1A1 | QRICH1 | TMED2 | USP25 |
| CASP4 | ELAVL4 | MAN1B1 | RACK1 | TMEM117 | VAPB |
| CAV1 | EP300 | MANF | RASGRF1 | TMEM129 | VCP |
| CCDC47 | ERLEC1 | MAP3K5 | RASGRF2 | TMEM259 | WFS1 |
| CCND1 | ERLIN1 | MARCHF6 | RCN3 | TMEM33 | XBP1 |
| CDK5RAP3 | ERLIN2 | MBTPS1 | RHBDD1 | TMEM67 | YOD1 |
| CEBPB | ERMP1 | MBTPS2 | RHBDD2 | TMTC3 |  |
| CERT1 | ERN1 | MIR199A1 | RNF103 | TMTC4 |  |
